# Supplementary material
Source: publisher figshare collection journal article supplement (https://karger.figshare.com/ndownloader/files/14392865)
Supplement: Supplementary file 1 [file 14392865]

Species,n,Source,Total brain volume (mm3),Telencephalon (mm3),Neocortical grey (mm3),Cerebellum (mm3)
Microcebus murinus,1,PBB,1696.29,1036.36,763.02,257.44
Galago senegalensis,1,PBB,3574.89,2341.69,1674.90,578.05
Aotus lemurinus griseimembra,1,PBB,14646.57,11045.66,7632.45,1701.99
Aotus trivirgatus boliviensis,1,PBB,16920.08,13091.83,9675.47,1623.46
Ateles fusciceps robustus,1,PBB,104988.09,83409.38,53484.99,12382.19
Lagothrix lagotricha,1,PBB,91676.70,73727.19,46869.06,9707.56
Callimico goeldii,1,PBB,12112.34,9129.15,6191.43,1270.39
Callithrix geoffroyi,1,PBB,7098.63,5444.31,4057.73,713.35
Callithrix jacchus,1,PBB,8124.76,6314.91,4541.98,686.23
Callithrix penicillata,2,PBB,6335.88,4694.76,3264.95,727.00
Callithrix pygmaea,1,PBB,4308.33,3202.87,2241.11,478.12
Cebus apella,1,PBB,74229.03,61387.98,37879.40,5931.26
Leontopithecus rosalia,2,PBB,11355.29,8746.57,6427.27,1089.90
Saguinus fuscicollis weddelli,1,PBB,8200.26,6176.23,4246.02,827.38
Saguinus imperator,1,PBB,9370.88,7145.58,5012.38,824.25
Saguinus midas,1,PBB,10782.87,8265.36,5863.16,1045.43
Saguinus oedipus,1,PBB,10673.28,8442.91,5996.43,874.42
Saimiri boliviensis,2,PBB,21657.87,18065.35,12418.81,1378.18
Saimiri sciureus,1,PBB,21642.56,17757.59,12190.01,1671.98
Cercopithecus hamlyni,1,PBB,70315.19,56609.12,35766.25,6783.83
Cercopithecus mitis albogularis,1,PBB,66443.85,54545.09,34895.38,5433.24
Cercopithecus nictitans,1,PBB,73183.47,59159.74,37132.31,7283.92
Colobus guereza,1,PBB,77247.81,60744.88,33524.27,7926.48
Erythrocebus patas,1,PBB,97005.79,81518.03,49024.07,7298.02
Lophocebus albigena,1,PBB,89810.41,73890.25,44892.22,8125.75
Macaca arctoides,3,PBB,90976.42,75646.51,47218.07,7583.76
Macaca fascicularis,2,PBB,53845.39,43435.73,26848.31,5145.91
Macaca fuscata,2,PBB,89294.87,75235.99,48310.08,6413.89
Macaca mulatta,1,PBB,88347.15,72877.16,44557.89,7677.54
Macaca nemestrina,1,PBB,94813.84,77846.96,42872.64,7126.30
Macaca nigra,1,PBB,75427.17,61089.79,34402.60,6995.10
Macaca silenus,1,PBB,95121.19,78735.70,51109.63,8282.98
Macaca sylvana,1,PBB,83284.63,68216.51,45352.78,7259.82
Mandrillus sphinx,1,PBB,128292.08,103719.19,66858.27,13347.95
Papio hamadryas,1,PBB,168266.30,139593.78,85309.20,14639.32
Gorilla gorilla gorilla,1,PBB,368395.55,295932.13,138853.21,43960.74
Gorilla gorilla gorilla,2,GANP,432243.52,341380.47,200844.97,60476.48
Pan paniscus,1,PBB,286618.26,224578.36,128612.97,38571.67
Pan paniscus,1,GANP,325918.11,257896.80,158461.10,45665.06
Pan troglodytes troglodytes,2,PBB,320578.92,253708.88,153386.69,44830.51
Pan troglodytes troglodytes,2,GANP,378562.79,298489.30,179591.89,50909.77
Pongo pygmaeus,2,GANP,323450.54,263834.03,164492.87,37797.51
